# Supplementary material for: Eucaloric Balanced Diet Improved Objective Sleep in Adolescents with Obesity
Source: MDPI journal article supplement (doi:10.3390/nu13103550), 2021-10-10
Supplement: s1 [file s1]

**Table S1:** Food items included in the standardized and *ad libitum* buffet meals

|                        | Groups                                | Food                                                                   | Nutritional values<br>per 100g of food |
|------------------------|---------------------------------------|------------------------------------------------------------------------|----------------------------------------|
| Breakfast              | Dairy products                        | 1 Bowl of milk (250mL)                                                 | 116 kcal                               |
|                        |                                       | 1 Yogurt (125g)                                                        | 78 kcal                                |
|                        | Fruits                                | 1 Orange or 1 apple or 1 pear                                          | 67 kcal                                |
|                        | Grain (cereal)                        | Bread (80g)                                                            | 210 kcal                               |
|                        |                                       | Cereal grains (60g)                                                    | 231 kcal                               |
|                        | Sweet product, sugars                 | Apricot jam (10g)                                                      | 26 kcal                                |
| Fats                   | Butter (10g)                          | 74 kcal                                                                |                                        |
| Lunch                  | Vegetables and legumes (raw)          | Grated carrot                                                          | 32 kcal                                |
|                        | Fish                                  | White fish fillet                                                      | 154 kcal                               |
|                        | Grain (cereal)                        | Steamed rice                                                           | 133 kcal                               |
|                        | Vegetables and legumes/beans (cooked) | Mixed vegetables (onion, carrot, tomatoes, red and yellow bell pepper) | 117 kcal                               |
|                        | Dairy products                        | Unflavoured yoghurt (125g)                                             | 62 kcal                                |
|                        | Sweet product, sugars                 | Applesauce (100g)                                                      | 90 kcal                                |
|                        |                                       | Sugars (5g)                                                            | 398 kcal                               |
|                        | Dinner                                | Vegetables and legumes (raw)                                           | Coleslaw                               |
| Lean meats and poultry |                                       | Sliced turkey                                                          | 121 kcal                               |
| Grain (cereal)         |                                       | Cooked pasta bread                                                     | 145 kcal<br>263 kcal                   |
|                        |                                       | Vegetables and legumes/beans (cooked)                                  | French bean                            |
| Dairy products         |                                       | Cottage cheese                                                         | 74 kcal                                |
| Fruits                 |                                       | 1Seasonal fruit                                                        | 48 kcal                                |
| Snack                  | Dairy products                        | 1 Bowl of milk (250mL per serving)                                     | 116 kcal                               |
|                        |                                       | 1 Yogurt (125g per serving)                                            | 78 kcal                                |
|                        |                                       | Brie cheese (20g per serving)                                          | 334 kcal                               |
|                        | Fruits                                | 1 Orange or 1 apple or 1 pear (1 fruit per serving)                    | 67 kcal                                |
|                        |                                       | Orange juice (100 mL per serving)                                      | 45kcal                                 |
|                        | Grain (cereal)                        | Bread (80g per serving)                                                | 210 kcal                               |
|                        |                                       | cereal grains (60g per serving)                                        | 231 kcal                               |

|                       |                               |          |
|-----------------------|-------------------------------|----------|
| Nuts and Seeds        | Walnuts (3 per serving)       | 654 kcal |
| Sweet product, sugars | Apricot jam (10g per serving) | 242 kcal |
|                       | Honey (10g per serving)       | 304 kcal |
|                       | Peaches canned in syrup       | 96 kcal  |
| Fats                  | Butter (10g per serving)      | 74 kcal  |

---

**Table S2.** Energy derived from each macronutrient among adolescents with obesity and their matched normal weight controls during *ad libitum* and eucaloric sessions

|                  | OB                |              | NW                |              | ANOVA                                      |                             |                         |                             |                     |                  |
|------------------|-------------------|--------------|-------------------|--------------|--------------------------------------------|-----------------------------|-------------------------|-----------------------------|---------------------|------------------|
|                  | <i>Ad libitum</i> | Eucaloric    | <i>Ad libitum</i> | Eucaloric    | Interaction<br>(Weight status X condition) |                             | Weight status<br>effect |                             | Condition<br>effect |                  |
|                  | Mean (SD)         | Mean (SD)    | Mean (SD)         | Mean (SD)    | F                                          | P value                     | F                       | P value                     | F                   | P value          |
| Protein<br>(%EI) | 15.12 (1.74)      | 18.01 (0.29) | 20.09 (3.15)      | 18.01 (0.36) | 11.48                                      | <b>&lt;0.001</b><br>ES=1.94 | 13.51                   | <b>&lt;0.001</b><br>ES=2.10 | 0.57                | 0.456<br>ES=0.28 |
| Lipids<br>(%EI)  | 30.52 (2.59)      | 30.05 (0.42) | 30.06 (3.60)      | 30.16 (0.45) | 0.169                                      | 0.845<br>ES=0.24            | 0.069                   | 0.934<br>ES=0.20            | 0.264               | 0.612<br>0.14    |
| CHO<br>(%EI)     | 54.35 (1.97)      | 51.94 (0.38) | 49.85 (3.96)      | 51.82 (0.56) | 6.04                                       | <b>0.007</b><br>ES=1.32     | 7.40                    | <b>0.003</b><br>ES=1.44     | 0.011               | 0.917<br>ES=0.08 |

CHO: carbohydrates; EI: energy intake; ES: effect size; NW: normal weight controls; OB: adolescents with obesity; significant P values are bolded.

**Table S3.** Energy derived from each macronutrient among adolescents with obesity (excluding the 4 participants with OSA) and their matched normal weight controls during *ad libitum* and eucaloric sessions

|                  | OB                |              | NW                |              | ANOVA                                      |                   |                         |                   |                     |                   |
|------------------|-------------------|--------------|-------------------|--------------|--------------------------------------------|-------------------|-------------------------|-------------------|---------------------|-------------------|
|                  | <i>Ad libitum</i> | Eucaloric    | <i>Ad libitum</i> | Eucaloric    | Interaction<br>(Weight status × condition) |                   | Weight status<br>effect |                   | Condition<br>effect |                   |
|                  | Mean (SD)         | Mean (SD)    | Mean (SD)         | Mean (SD)    | F                                          | P value           | F                       | P value           | F                   | P value           |
| Protein<br>(%EI) | 15.29 (1.70)      | 17.93 (0.27) | 20.09 (3.15)      | 18.01 (0.36) | 17.25                                      | <0.001<br>ES=1.08 | 21.94                   | <0.001<br>ES=1.13 | 0.21                | 0.650<br>ES=0.11  |
| Lipids<br>(%EI)  | 30.66 (2.83)      | 30.05 (0.42) | 30.00 (3.55)      | 30.14 (0.46) | 0.30                                       | 0.589<br>ES=0.17  | 0.20                    | 0.658<br>ES=0.13  | 0.10                | 0.753<br>0.09     |
| CHO<br>(%EI)     | 54.05 (2.17)      | 52.02 (0.23) | 49.90 (3.99)      | 51.85 (0.57) | 7.70                                       | 0.001<br>ES=1.77  | 9.79                    | 0.005<br>ES=0.85  | 0.003               | 0.955<br>ES<0.001 |

CHO: carbohydrates; EI: energy intake; ES: effect size; NW: normal weight controls; OB: adolescents with obesity; OSA: obstructive sleep apnea; significant P values are bolded.

**Table S4.** Distribution of energy intake throughout the four meals among adolescents with obesity (excluding the 4 participants with OSA) and their matched normal weight controls during ad libitum and eucaloric sessions

|              | OB without OSA    |                | NW                |               | ANOVA                                      |                             |                         |                             |                     |                             |
|--------------|-------------------|----------------|-------------------|---------------|--------------------------------------------|-----------------------------|-------------------------|-----------------------------|---------------------|-----------------------------|
|              | <i>Ad libitum</i> | Eucaloric      | <i>Ad libitum</i> | Eucaloric     | Interaction<br>(Weight status × condition) |                             | Weight status<br>effect |                             | Condition<br>effect |                             |
|              | Mean (SD)         | Mean (SD)      | Mean (SD)         | Mean (SD)     | F                                          | p value                     | F                       | p value                     | F                   | p value                     |
| EI Dinner    | 942.20(155.47)    | 848.50(128.73) | 729.64(95.79)     | 730.36(46.70) | 6.63                                       | <b>0.017</b><br>ES=0.35     | 16.40                   | <b>&lt;0.001</b><br>ES=1.50 | 6.43                | <b>0.019</b><br>ES=0.35     |
| EI Lunch     | 1347(173.23)      | 855.50(126.41) | 803.86(107.14)    | 735(51.95)    | 67.88                                      | <b>&lt;0.001</b><br>ES=0.86 | 65.82                   | <b>&lt;0.001</b><br>ES=1.59 | 119.32              | <b>&lt;0.001</b><br>ES=1.23 |
| EI breakfast | 781.30(123.56)    | 705.30(106.07) | 644.71(46.87)     | 609.29(41.34) | 4.71                                       | <b>0.041</b><br>ES=0.20     | 13.001                  | <b>0.002</b><br>ES=1.38     | 35.53               | <b>0.001</b><br>ES=0.57     |
| EI snacks    | 468.90(81.30)     | 429.90(65.20)  | 372.79(21.91)     | 350.57(50.10) | 0.93                                       | 0.345<br>ES=0.11            | 16.85                   | <b>&lt;0.001</b><br>ES=1.56 | 12.39               | <b>0.002</b><br>ES=0.44     |

EI: energy intake; ES: effect size; NW: normal weight controls; OB: adolescents with obesity; OSA: obstructive sleep apnea; significant P values are bolded.

**Table S5.** Sleep based on EEG-recording among adolescents with obesity (excluding the 4 participants with OSA) and their matched normal weight controls during 3rd night of *ad libitum* and eucaloric sessions.

|                     | OB without OSA    |                | NW                |                | ANOVA                                      |                         |                         |                         |                     |                             |
|---------------------|-------------------|----------------|-------------------|----------------|--------------------------------------------|-------------------------|-------------------------|-------------------------|---------------------|-----------------------------|
|                     | <i>Ad libitum</i> | Eucaloric      | <i>Ad libitum</i> | Eucaloric      | Interaction<br>(weight status × condition) |                         | Weight status<br>effect |                         | Condition<br>effect |                             |
|                     | Mean (SD)         | Mean (SD)      | Mean (SD)         | Mean (SD)      | F                                          | p value                 | F                       | p value                 | F                   | p value                     |
| SE (%)              | 78.17 (10.38)     | 79.74 (11.21)  | 90.50 (6.37)      | 91.10 (6.78)   | 1.71                                       | 0.204<br>ES=0           | 11.30                   | <b>0.003</b><br>ES=1.42 | 8.39                | <b>0.008</b><br>ES=0.11     |
| SL (min)            | 30.70 (23.30)     | 20.20 (18.07)  | 19.71 (11.89)     | 16.14 (13.09)  | 6.22                                       | <b>0.021</b><br>ES=0.21 | 1.27                    | 0.271<br>ES=0.46        | 25.67               | <b>&lt;0.001</b><br>ES=0.43 |
| WASO (min)          | 87.20 (46.73)     | 89.20 (51.16)  | 31.57 (23.86)     | 31.93 (25.35)  | 0.36                                       | 0.557                   | 13.99                   | <b>0.001</b><br>ES=1.59 | 0.73                | 0.402                       |
| Wake (min)          | 117.90 (56.05)    | 109.40 (60.52) | 51.29 (34.37)     | 48.07 (36.61)  | 1.71                                       | 0.204                   | 11.30                   | <b>0.003</b><br>ES=1.42 | 8.41                | <b>0.008</b><br>ES=0.11     |
| Stage REM (min)     | 73.91 (29.87)     | 75.40 (27.13)  | 103.50 (40.83)    | 95.86 (38.32)  | 2.35                                       | 0.140                   | 3.03                    | 0.096                   | 1.06                | 0.314                       |
| Stage N1 (min)      | 38.10 (8.06)      | 30.70 (8.95)   | 30.71 (16.35)     | 29.71 (17.82)  | 9.09                                       | <b>0.006</b><br>ES=0.23 | 0.52                    | 0.478                   | 15.66               | <b>&lt;0.001</b><br>ES=0.3  |
| Stage N2 (min)      | 211.70 (23.73)    | 206.80 (26.27) | 256.79 (46.18)    | 258.29 (48.65) | 3.01                                       | 0.097                   | 8.69                    | <b>0.007</b><br>ES=1.25 | 0.85                | 0.366                       |
| Stage N3 (min)      | 98.39 (52.95)     | 117.70 (59.59) | 97.71 (47.71)     | 108.07 (50.39) | 0.87                                       | 0.362                   | 0.06                    | 0.809                   | 9.52                | <b>0.005</b><br>ES=0.29     |
| Arousals (events/h) | 18.04 (2.33)      | 14.94 (4.26)   | 13.38 (5.47)      | 12.34 (3.68)   | 3.12                                       | 0.091                   | 4.90                    | <b>0.038</b><br>ES=0.86 | 12.51               | <b>0.002</b><br>ES=0.46     |

Eucaloric: dietary intake to energy requirement; NW: normal-weight controls; OB: adolescents with obesity; OSA: obstructive sleep apnea; REM: rapid eye movement; SE: sleep efficiency; SL: sleep latency; SD: standard deviation; significant P values are bolded; \*: significant difference in Post hoc pairwise comparisons (*ad libitum* vs eucaloric) with  $p < 0.05$ .

\*\*: significant difference in Post hoc pairwise comparisons (*ad libitum* vs eucaloric) with  $p < 0.01$ . ES: effect size.

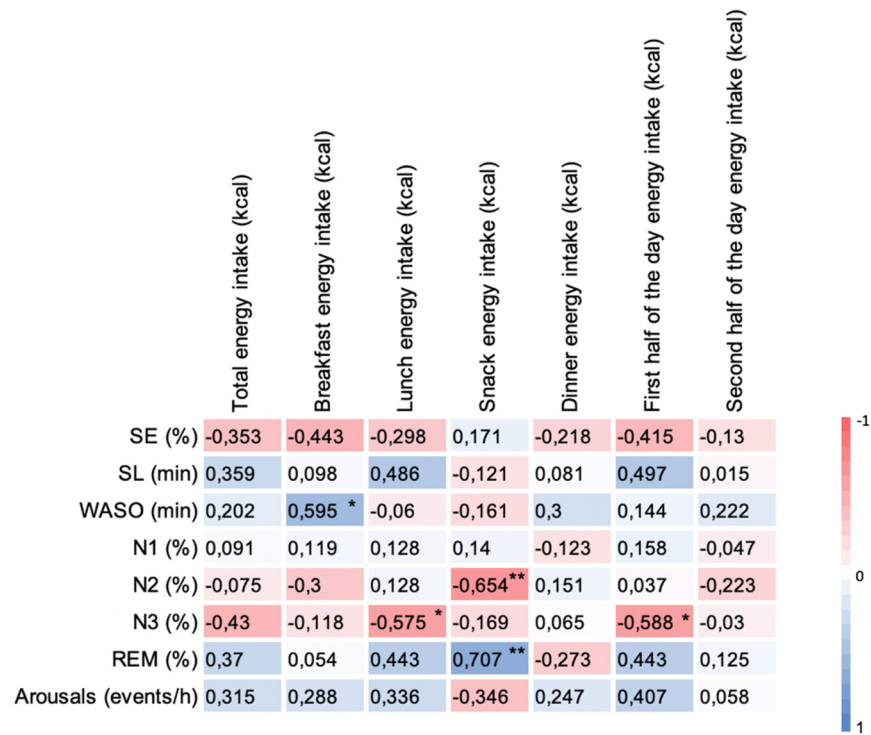

**Figure S1.** Heatmap representation of the correlations between  $\Delta$  energy intake and  $\Delta$  sleep outcomes between sessions (*ad libitum* – eucaloric) in NW group. Red indicates a negative relationship whereas blue indicates a positive relationship; the darker the color, the higher the Pearson coefficient; \*: significant correlation with  $p < 0.05$ ; \*\*: significant correlation with  $p < 0.01$ .
